# Supplementary material for: The Legacy of Hurricanes, Historic Land Cover, and Municipal Ordinances on Urban Tree Canopy in Florida (United States)
Source: Frontiers journal article supplement (doi:10.3389/ffgc.2022.742157), 2022-02-14
Supplement: Table_1.DOCX [file Table_1.DOCX]

Supplementary Material

**Table 1.** Canopy analysis results for the 300 most populous cities in Florida (United States). This table includes percent urban tree canopy (UTC), percent UTC excluding uninhabited Census blocks (e.g., nature preserves), standard error (SE),.upper and lower confidence intervals (CI) and percent agreement between the two interpreters.

| **Municipality** | **UTC (%)** | **Developed UTC (%)** | **SE (%)z** | **95% CI Lower (%)y** | **95% CI Upper (%)x** | **Agreement (%)w** |
| --- | --- | --- | --- | --- | --- | --- |
| Alachua | 44.3 | 44.3 | 0.011 | 44.2 | 44.3 | 97.5 |
| Altamonte Springs | 39.7 | 39.7 | 0.011 | 39.7 | 39.7 | 92.5 |
| Apalachicola | 30.1 | 30.1 | 0.011 | 30.1 | 30.2 | 87.5 |
| Apopka | 34.3 | 34.3 | 0.011 | 34.3 | 34.3 | 93.5 |
| Arcadia | 32.0 | 32.0 | 0.011 | 31.9 | 32.0 | 96.5 |
| Astatula | 44.1 | 44.1 | 0.011 | 44.1 | 44.1 | 94.0 |
| Atlantic Beach | 44.2 | 44.2 | 0.012 | 44.2 | 44.2 | 94.5 |
| Atlantis | 17.7 | 17.7 | 0.009 | 17.7 | 17.7 | 89.0 |
| Auburndale | 23.5 | 23.5 | 0.012 | 23.5 | 23.5 | 91.0 |
| Aventura | 22.6 | 22.7 | 0.010 | 22.6 | 22.6 | 96.0 |
| Avon Park | 25.0 | 25.0 | 0.010 | 25.0 | 25.0 | 93.5 |
| Bal Harbour | 25.1 | 26.1 | 0.011 | 25.0 | 25.1 | 94.0 |
| Bartow | 31.7 | 31.7 | 0.011 | 31.7 | 31.7 | 93.5 |
| Bay Harbor Islands | 20.8 | 20.8 | 0.009 | 20.8 | 20.8 | 97.5 |
| Belleair | 28.2 | 10.0 | 0.007 | 28.2 | 28.3 | 94.5 |
| Belleair Bluffs | 21.9 | 33.2 | 0.015 | 21.8 | 21.9 | 86.0 |
| Belle Glade | 10.0 | 21.9 | 0.009 | 10.0 | 10.0 | 92.5 |
| Belle Isle | 33.2 | 28.2 | 0.010 | 33.2 | 33.2 | 90.4 |
| Belleview | 26.0 | 26.0 | 0.010 | 26.0 | 26.0 | 95.0 |
| Biscayne Park | 45.7 | 45.7 | 0.011 | 45.7 | 45.7 | 89.0 |
| Blountstown | 53.3 | 53.3 | 0.011 | 53.2 | 53.3 | 93.0 |
| Boca Raton | 27.8 | 27.8 | 0.010 | 27.8 | 27.8 | 90.0 |
| Bonifay | 47.3 | 47.3 | 0.011 | 47.3 | 47.3 | 88.5 |
| Bonita Springs | 40.9 | 40.9 | 0.012 | 40.9 | 40.9 | 93.0 |
| Bowling Green | 27.0 | 27.0 | 0.010 | 27.0 | 27.0 | 94.0 |
| Boynton Beach | 23.4 | 23.4 | 0.010 | 23.4 | 23.4 | 88.8 |
| Bradenton | 34.5 | 34.5 | 0.012 | 34.5 | 34.5 | 89.8 |
| Brooksville | 58.0 | 58.0 | 0.011 | 58.0 | 58.0 | 94.5 |
| Bunnell | 65.6 | 65.6 | 0.011 | 65.6 | 65.7 | 88.5 |
| Bushnell | 23.5 | 23.5 | 0.010 | 23.4 | 23.5 | 95.5 |
| Callaway | 41.6 | 41.6 | 0.011 | 41.6 | 41.6 | 91.0 |
| Cape Canaveral | 24.3 | 24.3 | 0.010 | 24.3 | 24.3 | 97.5 |
| Cape Coral | 23.2 | 23.2 | 0.010 | 23.2 | 23.3 | 92.0 |
| Carrabelle | 46.6 | 46.6 | 0.012 | 46.6 | 46.6 | 84.5 |
| Casselberry | 42.3 | 42.3 | 0.012 | 42.3 | 42.3 | 93.0 |
| Century | 58.3 | 58.3 | 0.011 | 58.3 | 58.4 | 90.0 |
| Chattahoochee | 63.0 | 63.0 | 0.011 | 63.0 | 63.0 | 93.0 |
| Chiefland | 36.5 | 36.5 | 0.011 | 36.5 | 36.5 | 95.5 |
| Chipley | 39.1 | 39.1 | 0.011 | 39.1 | 39.2 | 88.0 |
| Clearwater | 31.3 | 31.3 | 0.010 | 31.3 | 31.4 | 96.0 |
| Clermont | 19.5 | 19.5 | 0.009 | 19.5 | 19.5 | 99.5 |
| Clewiston | 12.9 | 12.9 | 0.008 | 12.9 | 12.9 | 96.5 |
| Cocoa | 45.5 | 45.5 | 0.011 | 45.5 | 45.5 | 93.5 |
| Cocoa Beach | 30.8 | 30.8 | 0.011 | 30.8 | 30.8 | 92.0 |
| Coconut Creek | 38.8 | 38.8 | 0.011 | 38.7 | 38.8 | 94.5 |
| Cooper City | 29.1 | 29.1 | 0.011 | 29.1 | 29.1 | 93.0 |
| Coral Gables | 50.2 | 50.2 | 0.012 | 50.1 | 50.2 | 89.7 |
| Coral Springs | 30.1 | 30.1 | 0.011 | 30.1 | 30.1 | 95.0 |
| Crestview | 50.3 | 50.3 | 0.011 | 50.3 | 50.3 | 89.5 |
| Crystal River | 54.8 | 54.8 | 0.012 | 54.8 | 54.8 | 94.5 |
| Cutler Bay | 32.4 | 33.0 | 0.011 | 32.4 | 32.5 | 88.5 |
| Dade City | 28.7 | 28.7 | 0.010 | 28.7 | 28.7 | 91.0 |
| Dania Beach | 30.0 | 30.0 | 0.011 | 30.0 | 30.0 | 93.0 |
| Davenport | 19.9 | 19.9 | 0.009 | 19.8 | 19.9 | 92.5 |
| Davie | 27.0 | 27.0 | 0.010 | 27.0 | 27.1 | 95.0 |
| Daytona Beach | 48.1 | 48.1 | 0.012 | 48.1 | 48.2 | 92.0 |
| Daytona Beach Shores | 7.5 | 7.5 | 0.006 | 7.5 | 7.5 | 95.5 |
| DeBary | 50.9 | 50.9 | 0.012 | 50.9 | 50.9 | 93.5 |
| Deerfield Beach | 22.4 | 22.4 | 0.010 | 22.4 | 22.5 | 92.5 |
| DeFuniak Springs | 59.1 | 59.1 | 0.011 | 59.1 | 59.1 | 90.5 |
| DeLand | 48.1 | 48.1 | 0.011 | 48.1 | 48.1 | 82.5 |
| Delray Beach | 22.9 | 22.9 | 0.010 | 22.9 | 23.0 | 92.0 |
| Deltona | 37.1 | 37.1 | 0.011 | 37.1 | 37.1 | 91.0 |
| Destin | 35.7 | 35.7 | 0.011 | 35.7 | 35.8 | 96.0 |
| Doral | 17.7 | 18.7 | 0.010 | 17.7 | 17.8 | 93.0 |
| Dundee | 23.2 | 23.2 | 0.010 | 23.2 | 23.3 | 95.5 |
| Dunedin | 41.4 | 41.4 | 0.011 | 41.4 | 41.4 | 92.0 |
| Dunnellon | 42.8 | 42.8 | 0.011 | 42.8 | 42.9 | 93.5 |
| Eagle Lake | 16.1 | 16.1 | 0.011 | 16.1 | 16.2 | 98.5 |
| Eatonville | 27.0 | 27.0 | 0.011 | 27.0 | 27.0 | 92.0 |
| Edgewater | 53.5 | 53.5 | 0.011 | 53.5 | 53.5 | 90.5 |
| Edgewood | 32.6 | 32.6 | 0.012 | 32.6 | 32.7 | 93.5 |
| El Portal | 37.6 | 37.6 | 0.011 | 37.5 | 37.6 | 84.0 |
| Estero | 40.1 | 40.1 | 0.012 | 40.1 | 40.1 | 96.0 |
| Eustis | 40.1 | 40.1 | 0.012 | 40.1 | 40.1 | 99.5 |
| Fellsmere | 24.7 | 24.7 | 0.010 | 24.7 | 24.7 | 93.0 |
| Fernandina Beach | 45.7 | 45.7 | 0.012 | 45.7 | 45.8 | 92.0 |
| Flagler Beach | 44.9 | 44.9 | 0.012 | 44.9 | 45.0 | 93.5 |
| Florida City | 20.0 | 20.0 | 0.009 | 20.0 | 20.0 | 89.0 |
| Fort Lauderdale | 26.1 | 26.1 | 0.010 | 26.1 | 26.1 | 89.9 |
| Fort Meade | 31.9 | 31.9 | 0.011 | 31.9 | 31.9 | 92.0 |
| Fort Myers | 29.6 | 29.6 | 0.011 | 29.6 | 29.6 | 98.5 |
| Fort Myers Beach | 28.8 | 28.8 | 0.011 | 28.8 | 28.8 | 93.5 |
| Fort Pierce | 34.0 | 34.0 | 0.011 | 34.0 | 34.0 | 92.5 |
| Fort Walton Beach | 31.3 | 31.3 | 0.010 | 31.2 | 31.3 | 99.0 |
| Freeport | 55.5 | 55.5 | 0.011 | 55.4 | 55.5 | 90.5 |
| Frostproof | 23.2 | 23.2 | 0.012 | 23.1 | 23.2 | 93.5 |
| Fruitland Park | 35.6 | 35.6 | 0.011 | 35.6 | 35.6 | 92.0 |
| Gainesville | 58.9 | 58.9 | 0.011 | 58.9 | 58.9 | 95.0 |
| Graceville | 45.8 | 45.8 | 0.011 | 45.8 | 45.8 | 91.5 |
| Grant-Valkaria | 46.0 | 46.0 | 0.011 | 46.0 | 46.0 | 89.5 |
| Greenacres | 27.3 | 49.2 | 0.013 | 27.3 | 27.4 | 94.5 |
| Green Cove Springs | 49.2 | 27.3 | 0.010 | 49.2 | 49.2 | 94.5 |
| Groveland | 17.5 | 17.5 | 0.009 | 17.5 | 17.5 | 91.0 |
| Gulf Breeze | 49.1 | 49.1 | 0.011 | 49.0 | 49.1 | 81.0 |
| Gulfport | 43.3 | 43.3 | 0.011 | 43.3 | 43.3 | 97.0 |
| Haines City | 18.0 | 18.0 | 0.009 | 17.9 | 18.0 | 99.5 |
| Hallandale Beach | 20.8 | 20.8 | 0.009 | 20.8 | 20.8 | 95.0 |
| Haverhill | 35.9 | 35.9 | 0.011 | 35.9 | 36.0 | 92.5 |
| Hialeah | 13.6 | 13.6 | 0.008 | 13.6 | 13.7 | 95.5 |
| Hialeah Gardens | 29.6 | 29.6 | 0.011 | 29.6 | 29.6 | 94.0 |
| Highland Beach | 28.1 | 46.0 | 0.011 | 28.0 | 28.1 | 93.0 |
| High Springs | 46.0 | 28.1 | 0.011 | 46.0 | 46.0 | 91.5 |
| Hilliard | 59.9 | 59.9 | 0.011 | 59.9 | 59.9 | 92.0 |
| Hillsboro Beach | 32.5 | 32.5 | 0.012 | 32.5 | 32.5 | 95.5 |
| Holly Hill | 34.0 | 34.0 | 0.012 | 34.0 | 34.0 | 94.5 |
| Hollywood | 28.7 | 28.7 | 0.011 | 28.6 | 28.7 | 91.5 |
| Holmes Beach | 29.4 | 29.4 | 0.011 | 29.4 | 29.4 | 93.0 |
| Homestead | 18.5 | 18.5 | 0.009 | 18.5 | 18.5 | 92.5 |
| Hypoluxo | 32.3 | 32.3 | 0.012 | 32.3 | 32.4 | 91.0 |
| Indialantic | 24.1 | 24.1 | 0.010 | 24.1 | 24.1 | 85.5 |
| Indian Harbour Beach | 14.5 | 14.5 | 0.008 | 14.5 | 14.6 | 94.0 |
| Indian River Shores | 60.5 | 60.5 | 0.011 | 60.5 | 60.6 | 91.5 |
| Indian Rocks Beach | 21.0 | 21.0 | 0.009 | 21.0 | 21.0 | 90.5 |
| Indiantown | 33.7 | 33.7 | 0.011 | 33.7 | 33.7 | 93.0 |
| Inverness | 49.0 | 49.0 | 0.011 | 48.9 | 49.0 | 91.5 |
| Islamorada | 52.3 | 52.3 | 0.011 | 52.2 | 52.3 | 95.0 |
| Jacksonville | 51.2 | 51.2 | 0.011 | 51.1 | 51.2 | 84.0 |
| Jacksonville Beach | 20.5 | 20.5 | 0.010 | 20.5 | 20.5 | 92.0 |
| Jasper | 41.8 | 41.8 | 0.011 | 41.8 | 41.8 | 92.0 |
| Juno Beach | 42.3 | 42.3 | 0.011 | 42.3 | 42.3 | 88.0 |
| Jupiter | 36.8 | 36.8 | 0.011 | 36.8 | 36.8 | 92.5 |
| Kenneth City | 21.6 | 21.6 | 0.009 | 21.6 | 21.6 | 95.0 |
| Key Biscayne | 29.6 | 29.7 | 0.010 | 29.6 | 29.7 | 95.5 |
| Key West | 26.9 | 26.9 | 0.010 | 26.9 | 27.0 | 92.0 |
| Kissimmee | 29.4 | 29.4 | 0.011 | 29.4 | 29.5 | 94.0 |
| LaBelle | 22.8 | 22.8 | 0.009 | 22.7 | 22.8 | 93.0 |
| Lady Lake | 32.6 | 32.6 | 0.011 | 32.6 | 32.6 | 91.5 |
| Lake Alfred | 24.5 | 24.5 | 0.011 | 24.5 | 24.5 | 91.5 |
| Lake City | 37.7 | 37.7 | 0.011 | 37.7 | 37.7 | 89.8 |
| Lake Clarke Shores | 24.6 | 24.6 | 0.010 | 24.6 | 24.7 | 96.0 |
| Lake Helen | 56.4 | 56.4 | 0.011 | 56.4 | 56.5 | 91.5 |
| Lakeland | 32.2 | 36.2 | 0.011 | 32.1 | 32.2 | 97.5 |
| Lake Mary | 36.2 | 18.0 | 0.009 | 36.2 | 36.2 | 91.0 |
| Lake Park | 18.0 | 19.2 | 0.009 | 17.9 | 18.0 | 94.5 |
| Lake Placid | 19.2 | 23.3 | 0.010 | 19.2 | 19.3 | 88.0 |
| Lake Wales | 23.3 | 27.5 | 0.011 | 23.3 | 23.3 | 90.2 |
| Lake Worth Beach | 27.5 | 32.2 | 0.011 | 27.4 | 27.5 | 92.0 |
| Lantana | 21.3 | 21.3 | 0.010 | 21.3 | 21.3 | 92.5 |
| Largo | 24.6 | 24.6 | 0.010 | 24.6 | 24.7 | 95.5 |
| Lauderdale-by-the-Sea | 20.4 | 26.4 | 0.010 | 20.4 | 20.4 | 92.0 |
| Lauderdale Lakes | 26.4 | 20.4 | 0.009 | 26.4 | 26.4 | 92.5 |
| Lauderhill | 22.4 | 22.4 | 0.010 | 22.4 | 22.4 | 90.0 |
| Leesburg | 37.8 | 37.8 | 0.011 | 37.7 | 37.8 | 94.0 |
| Lighthouse Point | 21.1 | 21.1 | 0.010 | 21.1 | 21.2 | 97.0 |
| Live Oak | 39.3 | 39.3 | 0.011 | 39.3 | 39.3 | 83.5 |
| Longboat Key | 36.4 | 36.4 | 0.011 | 36.4 | 36.4 | 96.0 |
| Longwood | 32.0 | 32.0 | 0.011 | 31.9 | 32.0 | 93.0 |
| Loxahatchee Groves | 38.6 | 38.6 | 0.011 | 38.6 | 38.7 | 84.0 |
| Lynn Haven | 22.7 | 22.7 | 0.009 | 22.7 | 22.7 | 84.0 |
| Macclenny | 43.5 | 43.5 | 0.011 | 43.5 | 43.6 | 88.0 |
| Madeira Beach | 11.2 | 11.2 | 0.007 | 11.1 | 11.2 | 93.5 |
| Madison | 40.8 | 40.8 | 0.011 | 40.8 | 40.9 | 88.5 |
| Maitland | 45.3 | 45.3 | 0.012 | 45.3 | 45.3 | 92.5 |
| Malabar | 40.0 | 40.0 | 0.011 | 40.0 | 40.0 | 90.0 |
| Malone | 17.9 | 17.9 | 0.009 | 17.9 | 17.9 | 92.5 |
| Mangonia Park | 21.3 | 21.3 | 0.009 | 21.3 | 21.3 | 93.0 |
| Marathon | 51.5 | 51.5 | 0.011 | 51.5 | 51.6 | 97.0 |
| Marco Island | 38.5 | 38.5 | 0.011 | 38.5 | 38.6 | 90.5 |
| Margate | 18.8 | 18.8 | 0.009 | 18.7 | 18.8 | 93.5 |
| Marianna | 36.4 | 36.4 | 0.011 | 36.4 | 36.4 | 91.0 |
| Mary Esther | 37.1 | 37.1 | 0.011 | 37.1 | 37.2 | 94.0 |
| Mascotte | 24.9 | 24.9 | 0.010 | 24.9 | 25.0 | 93.5 |
| Melbourne | 20.8 | 20.8 | 0.009 | 20.7 | 20.8 | 89.5 |
| Melbourne Beach | 23.5 | 23.5 | 0.010 | 23.5 | 23.6 | 84.5 |
| Miami | 23.5 | 23.4 | 0.010 | 23.5 | 23.5 | 91.2 |
| Miami Beach | 24.0 | 24.1 | 0.010 | 23.9 | 24.0 | 92.5 |
| Miami Gardens | 19.4 | 19.4 | 0.009 | 19.4 | 19.4 | 93.0 |
| Miami Lakes | 34.3 | 34.3 | 0.011 | 34.2 | 34.3 | 91.5 |
| Miami Shores | 32.9 | 32.9 | 0.011 | 32.9 | 32.9 | 95.0 |
| Miami Springs | 24.7 | 25.2 | 0.010 | 24.7 | 24.8 | 88.0 |
| Midway | 68.1 | 68.1 | 0.010 | 68.1 | 68.1 | 92.5 |
| Milton | 46.0 | 46.0 | 0.011 | 46.0 | 46.0 | 91.0 |
| Minneola | 38.7 | 38.7 | 0.011 | 38.7 | 38.7 | 89.0 |
| Miramar | 28.5 | 28.5 | 0.011 | 28.5 | 28.5 | 87.0 |
| Monticello | 56.3 | 56.3 | 0.011 | 56.2 | 56.3 | 89.5 |
| Moore Haven | 14.2 | 14.2 | 0.008 | 14.2 | 14.2 | 95.0 |
| Mount Dora | 36.9 | 36.9 | 0.012 | 36.9 | 36.9 | 95.0 |
| Mulberry | 44.3 | 44.3 | 0.012 | 44.3 | 44.3 | 93.5 |
| Naples | 30.5 | 30.5 | 0.011 | 30.4 | 30.5 | 97.5 |
| Neptune Beach | 33.9 | 33.9 | 0.012 | 33.8 | 33.9 | 87.0 |
| Newberry | 34.6 | 37.1 | 0.011 | 34.6 | 34.6 | 93.5 |
| New Port Richey | 37.1 | 51.2 | 0.012 | 37.1 | 37.1 | 96.0 |
| New Smyrna Beach | 51.2 | 34.6 | 0.011 | 51.2 | 51.2 | 93.5 |
| Niceville | 62.1 | 62.1 | 0.011 | 62.1 | 62.1 | 92.0 |
| North Bay Village | 15.7 | 15.7 | 0.008 | 15.7 | 15.8 | 97.5 |
| North Lauderdale | 21.3 | 21.3 | 0.009 | 21.3 | 21.4 | 89.5 |
| North Miami | 37.9 | 37.9 | 0.011 | 37.9 | 37.9 | 93.5 |
| North Miami Beach | 24.0 | 24.0 | 0.010 | 24.0 | 24.0 | 98.5 |
| North Palm Beach | 33.2 | 33.2 | 0.013 | 33.2 | 33.2 | 98.5 |
| North Port | 44.9 | 44.9 | 0.011 | 44.9 | 45.0 | 91.0 |
| Oak Hill | 62.0 | 62.0 | 0.011 | 62.0 | 62.0 | 84.0 |
| Oakland | 42.4 | 20.1 | 0.009 | 42.4 | 42.4 | 91.5 |
| Oakland Park | 20.1 | 42.4 | 0.011 | 20.1 | 20.1 | 88.4 |
| Ocala | 35.3 | 35.3 | 0.011 | 35.3 | 35.3 | 91.5 |
| Ocean Ridge | 36.7 | 36.7 | 0.013 | 36.7 | 36.7 | 93.0 |
| Ocoee | 35.0 | 35.0 | 0.011 | 35.0 | 35.0 | 95.0 |
| Okeechobee | 29.1 | 29.1 | 0.010 | 29.1 | 29.2 | 95.0 |
| Oldsmar | 53.3 | 53.3 | 0.011 | 53.3 | 53.3 | 99.5 |
| Opa-locka | 14.3 | 14.3 | 0.008 | 14.3 | 14.3 | 94.0 |
| Orange City | 46.0 | 46.0 | 0.011 | 45.9 | 46.0 | 94.5 |
| Orange Park | 46.8 | 46.8 | 0.014 | 46.8 | 46.8 | 92.5 |
| Orlando | 27.6 | 27.6 | 0.010 | 27.6 | 27.6 | 95.9 |
| Ormond Beach | 51.5 | 51.5 | 0.012 | 51.5 | 51.6 | 93.0 |
| Oviedo | 45.2 | 45.2 | 0.011 | 45.2 | 45.2 | 98.0 |
| Pahokee | 8.1 | 8.1 | 0.006 | 8.1 | 8.1 | 91.5 |
| Palatka | 47.6 | 47.6 | 0.011 | 47.5 | 47.6 | 96.0 |
| Palm Bay | 30.7 | 30.7 | 0.010 | 30.7 | 30.7 | 90.5 |
| Palm Beach | 27.0 | 43.0 | 0.011 | 27.0 | 27.0 | 93.0 |
| Palm Beach Gardens | 43.0 | 27.0 | 0.014 | 43.0 | 43.0 | 88.5 |
| Palm Coast | 57.0 | 57.0 | 0.011 | 57.0 | 57.0 | 90.7 |
| Palmetto | 25.4 | 26.9 | 0.010 | 25.4 | 25.4 | 93.0 |
| Palmetto Bay | 47.5 | 25.4 | 0.010 | 47.5 | 47.5 | 91.5 |
| Palm Springs | 26.9 | 47.5 | 0.011 | 26.9 | 27.0 | 88.0 |
| Panama City | 26.2 | 26.2 | 0.010 | 26.1 | 26.2 | 83.5 |
| Panama City Beach | 47.8 | 47.8 | 0.011 | 47.7 | 47.8 | 89.0 |
| Parker | 22.4 | 22.4 | 0.010 | 22.4 | 22.4 | 92.5 |
| Parkland | 31.2 | 31.2 | 0.011 | 31.2 | 31.3 | 91.0 |
| Pembroke Park | 10.6 | 10.6 | 0.007 | 10.5 | 10.6 | 93.0 |
| Pembroke Pines | 20.6 | 20.6 | 0.010 | 20.5 | 20.6 | 94.5 |
| Pensacola | 36.4 | 36.4 | 0.011 | 36.3 | 36.4 | 96.0 |
| Perry | 55.5 | 55.5 | 0.011 | 55.5 | 55.6 | 89.0 |
| Pierson | 58.2 | 58.2 | 0.011 | 58.2 | 58.2 | 92.0 |
| Pinecrest | 50.4 | 50.4 | 0.011 | 50.4 | 50.5 | 91.5 |
| Pinellas Park | 23.6 | 23.6 | 0.010 | 23.5 | 23.6 | 95.5 |
| Plantation | 31.0 | 32.7 | 0.011 | 30.9 | 31.0 | 93.0 |
| Plant City | 32.7 | 31.0 | 0.011 | 32.7 | 32.7 | 97.0 |
| Polk City | 30.0 | 30.0 | 0.011 | 30.0 | 30.0 | 88.5 |
| Pompano Beach | 17.8 | 17.8 | 0.009 | 17.8 | 17.8 | 92.0 |
| Ponce Inlet | 61.0 | 61.0 | 0.014 | 61.0 | 61.0 | 94.5 |
| Port Orange | 42.1 | 42.1 | 0.012 | 42.1 | 42.1 | 91.5 |
| Port Richey | 50.3 | 50.3 | 0.011 | 50.3 | 50.4 | 91.5 |
| Port St.Joe | 38.8 | 38.8 | 0.011 | 38.8 | 38.8 | 84.5 |
| Port St. Lucie | 26.7 | 26.7 | 0.010 | 26.7 | 26.7 | 93.0 |
| Punta Gorda | 50.4 | 50.4 | 0.013 | 50.3 | 50.4 | 99.0 |
| Quincy | 55.5 | 55.5 | 0.011 | 55.5 | 55.6 | 93.5 |
| Redington Shores | 5.9 | 5.9 | 0.005 | 5.9 | 5.9 | 94.5 |
| Riviera Beach | 21.5 | 21.5 | 0.010 | 21.5 | 21.5 | 95.0 |
| Rockledge | 33.4 | 33.4 | 0.011 | 33.4 | 33.4 | 91.0 |
| Royal Palm Beach | 23.8 | 23.8 | 0.010 | 23.8 | 23.9 | 92.5 |
| Safety Harbor | 46.0 | 46.0 | 0.011 | 45.9 | 46.0 | 87.0 |
| Sanford | 32.2 | 32.2 | 0.011 | 32.1 | 32.2 | 94.5 |
| Sanibel | 68.7 | 68.7 | 0.011 | 68.7 | 68.8 | 94.0 |
| Sarasota | 32.8 | 32.8 | 0.011 | 32.7 | 32.8 | 98.0 |
| Satellite Beach | 11.6 | 11.6 | 0.007 | 11.6 | 11.6 | 97.5 |
| Sebastian | 31.1 | 31.1 | 0.011 | 31.1 | 31.2 | 97.0 |
| Sebring | 27.6 | 27.6 | 0.013 | 27.6 | 27.6 | 92.5 |
| Seminole | 30.2 | 30.2 | 0.011 | 30.1 | 30.2 | 96.0 |
| Sewalls Point | 51.7 | 51.7 | 0.016 | 51.6 | 51.7 | 95.5 |
| Sneads | 39.0 | 39.0 | 0.011 | 39.0 | 39.0 | 90.0 |
| South Bay | 12.6 | 12.6 | 0.008 | 12.6 | 12.6 | 95.0 |
| South Daytona | 29.6 | 29.6 | 0.012 | 29.5 | 29.6 | 91.5 |
| South Miami | 34.5 | 34.5 | 0.011 | 34.5 | 34.5 | 97.5 |
| South Pasadena | 14.9 | 14.9 | 0.008 | 14.9 | 14.9 | 93.0 |
| Southwest Ranches | 33.5 | 33.5 | 0.011 | 33.4 | 33.5 | 86.5 |
| Springfield | 25.1 | 25.1 | 0.010 | 25.1 | 25.1 | 94.0 |
| Starke | 53.4 | 34.3 | 0.012 | 53.4 | 53.4 | 92.0 |
| St. Augustine | 34.3 | 42.5 | 0.011 | 34.2 | 34.3 | 94.0 |
| St. Augustine Beach | 42.5 | 22.4 | 0.010 | 42.5 | 42.5 | 85.5 |
| St. Cloud | 22.4 | 15.5 | 0.008 | 22.3 | 22.4 | 96.0 |
| St. Pete Beach | 15.5 | 34.1 | 0.010 | 15.4 | 15.5 | 98.0 |
| St. Pete rsburg | 34.1 | 53.4 | 0.011 | 34.1 | 34.1 | 91.6 |
| Stuart | 38.6 | 38.6 | 0.013 | 38.6 | 38.7 | 93.0 |
| Sunny Isles Beach | 22.2 | 22.2 | 0.009 | 22.2 | 22.2 | 95.0 |
| Sunrise | 24.0 | 24.0 | 0.010 | 24.0 | 24.0 | 99.5 |
| Surfside | 20.1 | 20.1 | 0.009 | 20.1 | 20.2 | 93.5 |
| Sweetwater | 15.3 | 15.3 | 0.008 | 15.3 | 15.4 | 98.0 |
| Tallahassee | 50.5 | 50.5 | 0.011 | 50.5 | 50.5 | 92.0 |
| Tamarac | 22.0 | 22.0 | 0.010 | 22.0 | 22.0 | 92.0 |
| Tampa | 37.9 | 38.7 | 0.011 | 37.9 | 37.9 | 92.0 |
| Tarpon Springs | 36.9 | 36.9 | 0.012 | 36.8 | 36.9 | 93.0 |
| Tavares | 42.2 | 42.2 | 0.012 | 42.2 | 42.3 | 92.0 |
| Temple Terrace | 52.0 | 52.0 | 0.011 | 52.0 | 52.1 | 93.0 |
| Tequesta | 31.8 | 31.8 | 0.011 | 31.7 | 31.8 | 96.5 |
| Titusville | 41.8 | 41.8 | 0.011 | 41.7 | 41.8 | 88.5 |
| Treasure Island | 12.8 | 12.8 | 0.008 | 12.8 | 12.8 | 94.5 |
| Trenton | 23.2 | 23.2 | 0.009 | 23.2 | 23.2 | 91.0 |
| Umatilla | 34.0 | 34.0 | 0.011 | 33.9 | 34.0 | 94.0 |
| Valparaiso | 47.9 | 47.9 | 0.011 | 47.9 | 47.9 | 91.0 |
| Venice | 24.1 | 24.1 | 0.010 | 24.1 | 24.1 | 90.0 |
| Vero Beach | 37.6 | 41.0 | 0.012 | 37.5 | 37.6 | 94.0 |
| Virginia Gardens | 28.0 | 28.0 | 0.010 | 27.9 | 28.0 | 93.0 |
| Wauchula | 32.3 | 32.3 | 0.010 | 32.3 | 32.3 | 93.5 |
| Wellington | 17.3 | 17.3 | 0.009 | 17.3 | 17.3 | 93.5 |
| West Melbourne | 30.5 | 30.5 | 0.011 | 30.5 | 30.6 | 90.5 |
| West Miami | 27.5 | 27.5 | 0.010 | 27.4 | 27.5 | 92.0 |
| Weston | 27.1 | 26.8 | 0.013 | 27.1 | 27.2 | 96.5 |
| West Palm Beach | 30.5 | 27.5 | 0.010 | 30.4 | 30.5 | 86.0 |
| West Park | 27.5 | 27.1 | 0.011 | 27.5 | 27.6 | 93.5 |
| Wewahitchka | 59.5 | 59.5 | 0.011 | 59.5 | 59.5 | 89.5 |
| Wildwood | 17.9 | 17.9 | 0.009 | 17.8 | 17.9 | 96.0 |
| Williston | 45.7 | 45.7 | 0.011 | 45.6 | 45.7 | 93.5 |
| Wilton Manors | 30.5 | 30.5 | 0.011 | 30.4 | 30.5 | 91.0 |
| Windermere | 39.2 | 39.2 | 0.011 | 39.1 | 39.2 | 83.5 |
| Winter Garden | 26.4 | 26.4 | 0.010 | 26.4 | 26.4 | 88.0 |
| Winter Haven | 25.5 | 25.5 | 0.011 | 25.5 | 25.6 | 91.5 |
| Winter Park | 40.5 | 40.5 | 0.012 | 40.5 | 40.6 | 92.0 |
| Winter Springs | 49.6 | 49.6 | 0.011 | 49.6 | 49.6 | 97.5 |
| Zephyrhills | 23.0 | 23.0 | 0.010 | 23.0 | 23.1 | 97.5 |
| Zolfo Springs | 40.4 | 40.4 | 0.011 | 40.4 | 40.4 | 92.0 |
